# Supplementary material for: Eye swapping temporally modulates potency of continuous flash suppression
Source: PubMed Central journal article supplement — J Vis. 2020 Mar 17;20(3):1. doi: 10.1167/jov.20.3.1 (PMC7401929; doi:10.1167/jov.20.3.1), 2020-03-17
Supplement: jovi-20-3-1_s001.pdf [file jovi-20-3-1_s001.pdf]

# Eye swapping temporally modulates potency of continuous flash suppression by Motomi Shimizu & Eiji Kimura

## Supplementary results

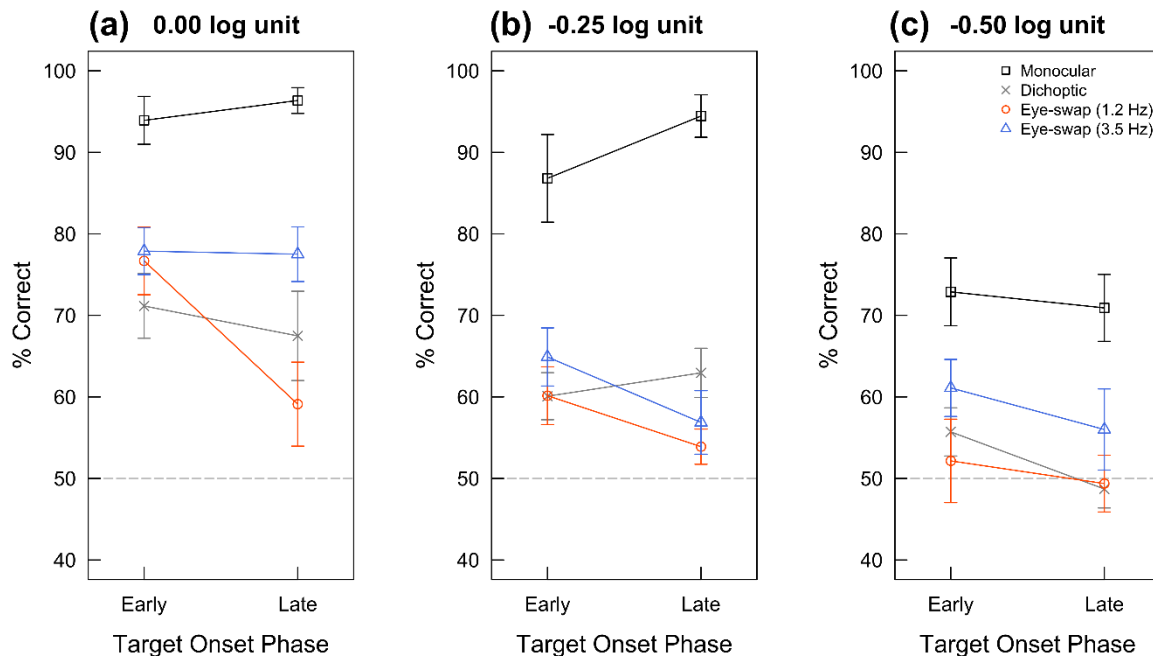

Figure S1. Percent correct performance of the target detection task for all contrast levels (0.00, -0.25, and -0.50 log unit) in Experiment 2. Note that Fig. S1(a) is the same as Fig. 3(b).

Figure S1 shows the percent correct performance in Experiment 2 plotted separately for each target contrast. A three-way repeated-measures ANOVA was conducted with factors of the target contrast, phase, and eye of presentation. There were significant main effects of the target contrast [ $F(2, 18) = 83.08, p < 0.001, \eta_p^2 = 0.90$ ]; of the phase [ $F(1, 9) = 14.58, p = 0.004, \eta_p^2 = 0.62$ ]; and of the eye of presentation [ $F(3, 27) = 37.62, p < 0.001, \eta_p^2 = 0.81$ ]. An interaction between the target contrast and the eye-of-presentation was significant [ $F(6, 54) = 2.40, p = 0.040, \eta_p^2 = 0.21$ ], which confirmed the prediction that differences in performance across different eye-of-presentation conditions would be more evident for higher target contrasts. Most importantly, we found a significant interaction between the phase and the eye of presentation [ $F(3, 27) = 3.39, p = 0.032, \eta_p^2 = 0.27$ ]. The effect of the phase was only significant in the 1.2-Hz eye-swapping condition and the performance was worse at the late phase [ $F(1, 9) = 12.67, p = 0.006, \eta_p^2 = 0.58$ ]. The interaction of the contrast and the phase was not significant [ $F(2, 18) = 0.81, p = 0.462, \eta_p^2 = 0.08$ ]. The three-way interaction was only marginally significant [ $F(6, 54) = 2.26, p = 0.051, \eta_p^2 = 0.20$ ], and visual inspection of Fig. S1 reveals that the difference in performance between the early and the late phase systematically increased with target contrast only in the 1.2-Hz eye-swapping condition.
